# Supplementary material
Source: Springer Nature journal article supplement (https://www.springermedizin.de/resource/supplementary/12963_2005_44_MOESM19_ESM.pdf/9572516)

# Male Ranking

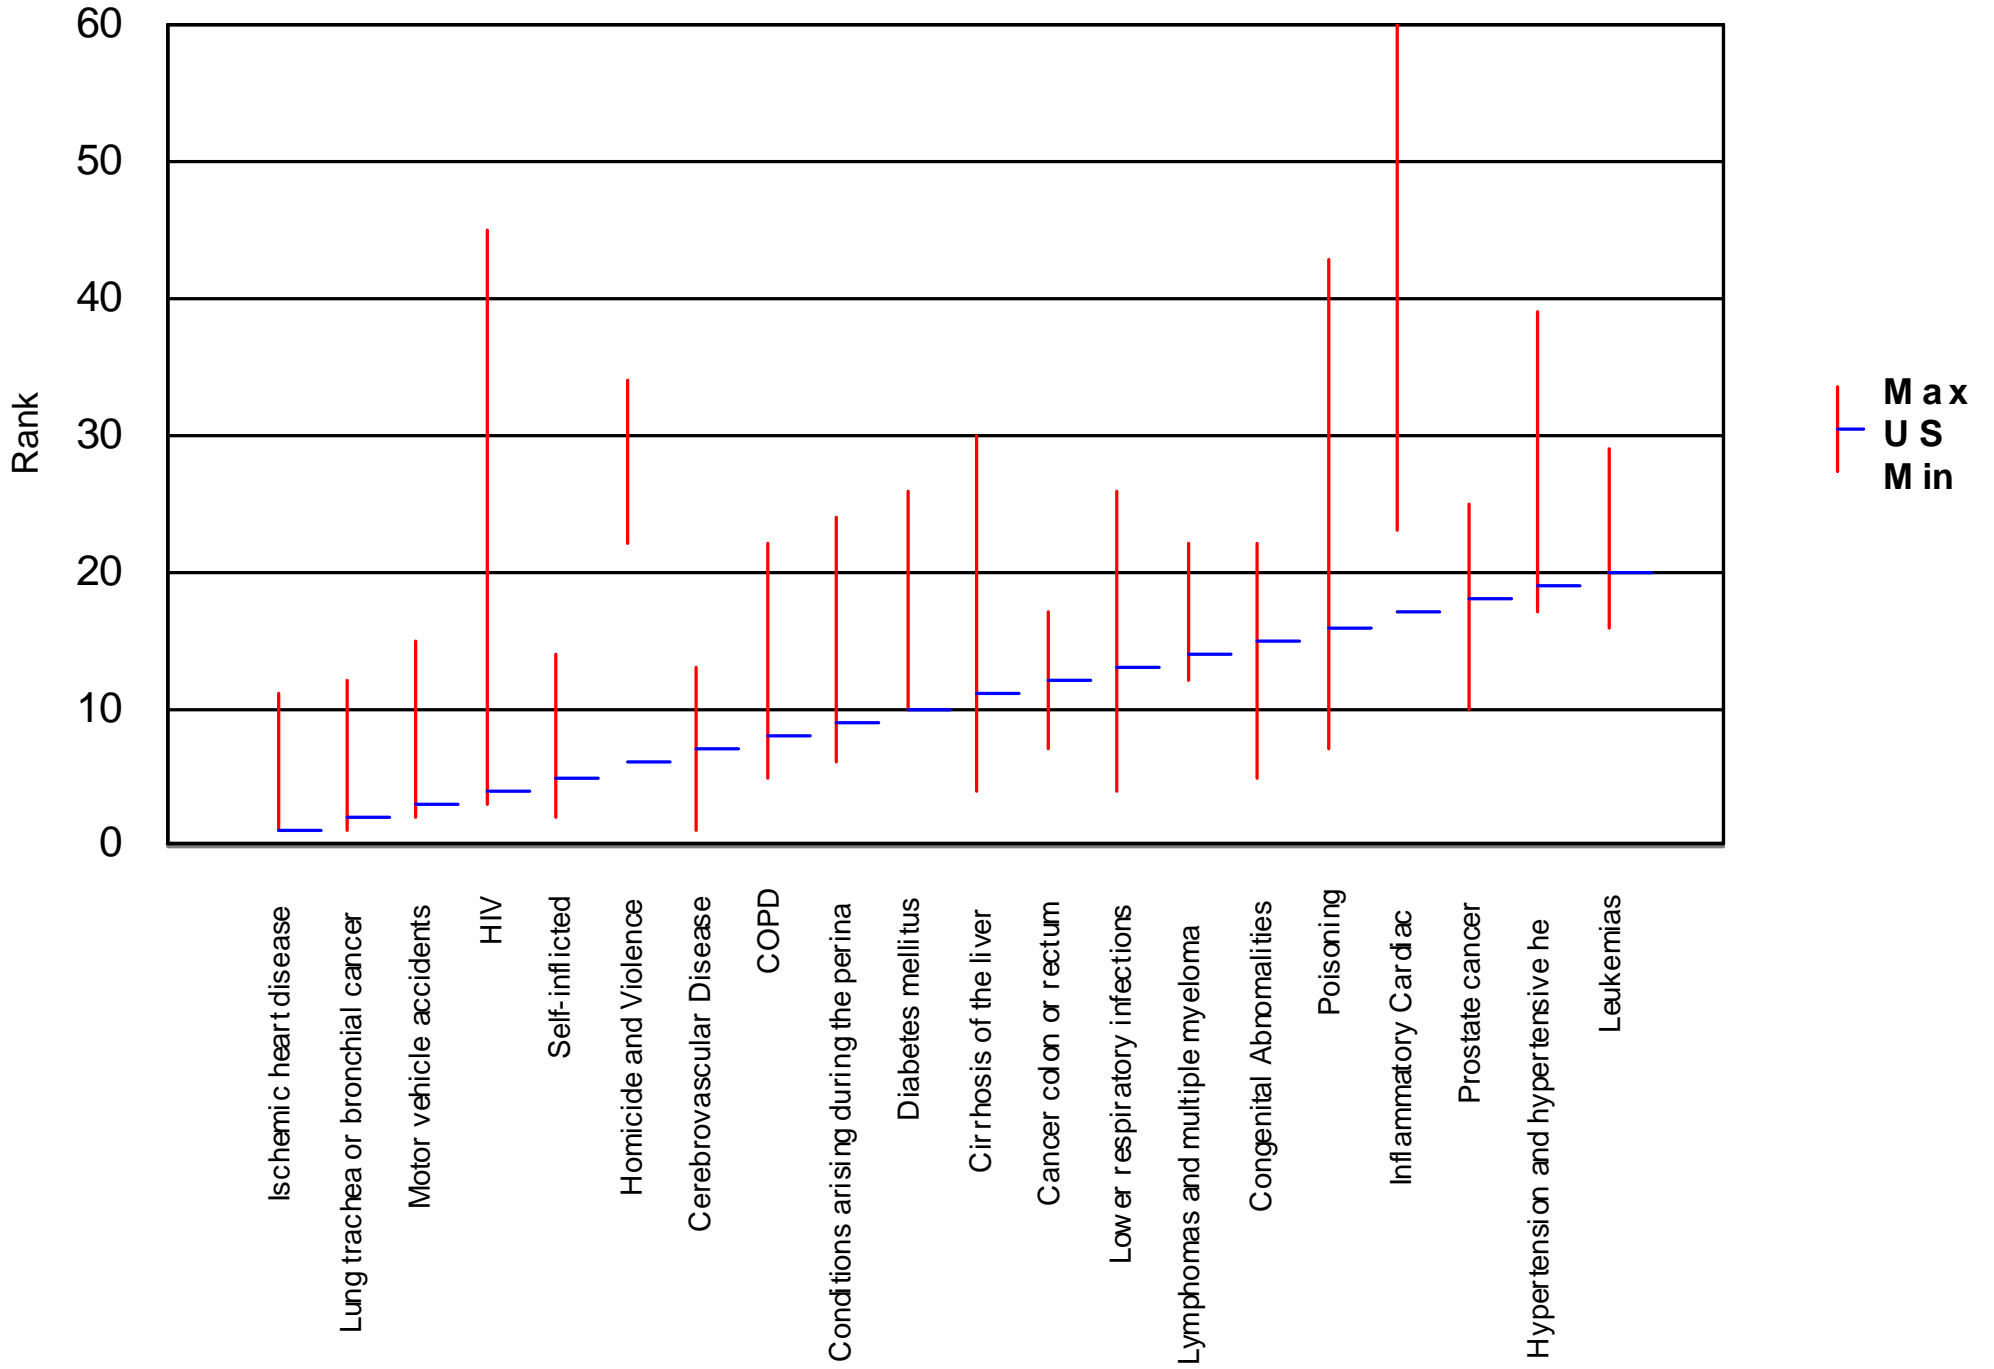

Supplement: MOESM19 [file 9572516]
